# Supplementary material for: High-efficiency and stable quasi-solid-state dye-sensitized solar cell based on low molecular mass organogelator electrolyte
Source: Royal Society of Chemistry journal article supplement (doi:10.1039/c4ta06188h), 2014-12-17
Supplement: c4ta06188h1.pdf [file c4ta06188h1.pdf]

## Supporting Information

### High-efficiency and stable quasi-solid-state dye-sensitized solar cell based on low molecular mass organogelator electrolyte

Li Tao,<sup>‡,a</sup> Zhipeng Huo,<sup>‡,\*a</sup> Yong Ding,<sup>a</sup> Songyuan Dai,<sup>\*,a,b</sup> Yi Li,<sup>a</sup> Lu Wang,<sup>a</sup> Jun Zhu,<sup>a</sup> Xu Pan,<sup>a</sup> Bing Zhang,<sup>b</sup> Jianxi Yao,<sup>b</sup> Mohammad K. Nazeeruddin,<sup>\*,c</sup> and Michael Grätzel<sup>c</sup>

<sup>a</sup>Key Laboratory of Novel Thin Film Solar Cells, Division of Solar Energy Materials and Engineering, Institute of Plasma Physics, Chinese Academy of Sciences, Hefei 230031, P. R. China

<sup>b</sup>Beijing Key Lab of Novel Thin Film Solar Cells, North China Electric Power University, Beijing, 102206, P. R. China

<sup>c</sup>Laboratory for Photonics and Interfaces, Institution of Chemical Sciences and Engineering, School of Basic Sciences, Swiss Federal Institute of Technology, CH-1015 Lausanne, Switzerland. E-mail: [mdkhaja.nazeeruddin@epfl.ch](mailto:mdkhaja.nazeeruddin@epfl.ch); Tel: +4121 693 6124

<sup>‡</sup> L. Tao and Z. P. Huo contributed equally to this research.

#### Corresponding authors

\* (S. Y. Dai) [sydai@ncepu.edu.cn](mailto:sydai@ncepu.edu.cn) (+86 10 61772268).

\* (Z. P. Huo) [zhipenghuo@163.com](mailto:zhipenghuo@163.com) (+86 551 65592190).

\* (M. K. Nazeeruddin) [mdkhaja.nazeeruddin@epfl.ch](mailto:mdkhaja.nazeeruddin@epfl.ch) (+41 21 69 36124)

#### Synthesis of low molecular mass organogelator

The *N,N'*-1,5-pentanediyldis-dodecanamide was synthesized by reacting lauroylchloride (0.14 mol) with 1,5-Diaminopentane (0.044 mol) and NaHCO<sub>3</sub> (0.13 mol) in mixture of water (150 mL) and ether (150 mL). After the reaction, the solvent was removed under vacuum at 50 °C and the gelators were obtained as white powder used with further recrystallization by ethanol. The production was obtained (16 g, 79%) as colorless leaflets. Anal. Calcd. For C<sub>29</sub>H<sub>58</sub>N<sub>2</sub>O<sub>2</sub>: C 74.62; H 12.52; N 6.00. Found: C 74.69; H 12.37; N 6.24.

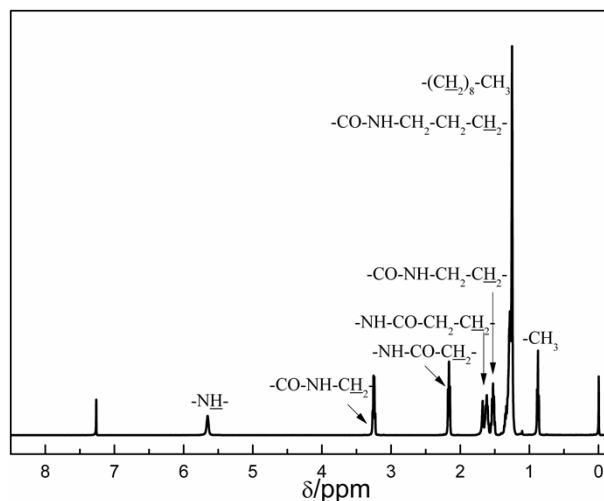

**Fig. S1** <sup>1</sup>H NMR chemical shifts of *N,N'*-1,5-pentanediyldis-dodecanamide in Chloroform-*d*

### *EIS measured at different DC biases*

The EIS measurements were carried out in the dark condition, therefore, we need a reverse direct-current bias to obtain the kinetic process at the  $\text{TiO}_2$  photoelectrode/electrolyte interface of DSSCs. Moreover, we have measured EIS at different DC biases, the differences in the two kind of electrolytes is similar at different DC biases in the manuscript. Therefore, we selected the DC bias which is closer to the open circuit potential.

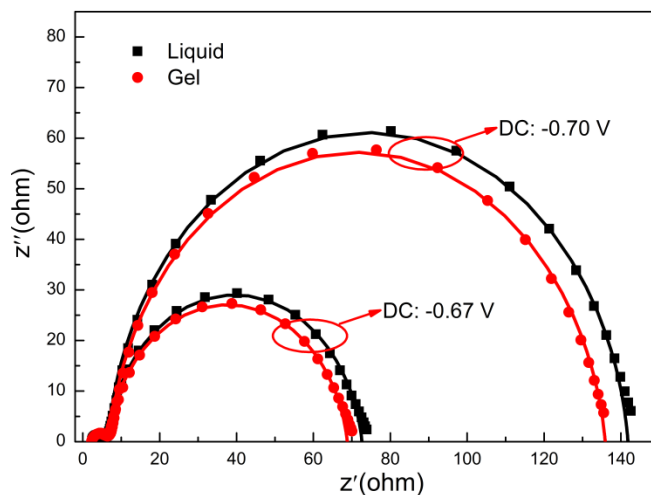

**Fig. S2** Electrochemical impedance spectroscopy (Nyquist plots) for DSSCs based on liquid and gel electrolytes at different DC biases.
